EDITORIAL

## *PLOS Medicine* 2015 Reviewer Thank You

The Public Library of Science (PLOS) and the *PLOS Medicine* editorial team would like to warmly thank all those individuals who participated in the peer review process this past year at *PLOS Medicine*. During 2015 over 630 reviewers from around the world helped evaluate the 144 articles we published, and offered valuable input and advice for those authors whose papers we did not publish.

The names of our 2015 reviewers are listed in [S1 Reviewer List](#). We are grateful to all our reviewers for sharing their expertise with *PLOS Medicine* authors, and for helping us to publish a highly read and highly regarded open access medical journal.

### Supporting Information

**S1 Reviewer List. Alphabetical list of 2015 *PLOS Medicine* reviewers.**  
(PDF)

### Reference

1. (2015) *PLOS Medicine* 2014 Reviewer Thank You. PLoS Med 12(2): e1001806. doi: [10.1371/journal.pmed.1001806](https://doi.org/10.1371/journal.pmed.1001806)

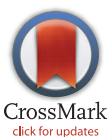

### OPEN ACCESS

**Citation:** (2016) *PLOS Medicine* 2015 Reviewer Thank You. PLoS Med 13(2): e1001983. doi:10.1371/journal.pmed.1001983

**Published:** February 23, 2016

**Copyright:** © 2016 The PLOS Medicine Staff. This is an open access article distributed under the terms of the [Creative Commons Attribution License](#), which permits unrestricted use, distribution, and reproduction in any medium, provided the original author and source are credited.

**Funding:** The authors received no specific funding for this work.

**Competing Interests:** The authors have declared that no competing interests exist.
